# Supplementary material for: Treatment preferences in juvenile idiopathic arthritis – a comparative analysis in two health care systems
Source: Pediatr Rheumatol Online J. 2013 Jan 15;11:3. doi: 10.1186/1546-0096-11-3 (PMC3573942; doi:10.1186/1546-0096-11-3)
Supplement: Additional file 1 — Text of electronic survey questionnaire from SurveyMonkey, english. [file 1546-0096-11-3-S1.pdf]

# Bevorzugte Behandlungsmethoden bei JIA in Deutschland und Kanada

Sehr geehrte Frau Kollegin, sehr geehrter Herr Kollege,

Vielen Dank für Ihre Bereitschaft, an unserer JIA-Umfrage teilzunehmen. Wir möchten herausfinden, ob es Unterschiede in den **bevorzugten Behandlungsmethoden für die Juvenile Idiopathische Arthritis** in verschiedenen Ländern mit vergleichbaren Gesundheitssystemen und einer Subspezialisierung für Pädiatrische Rheumatologie gibt. Wir fragen Kinderreumatologen in **Deutschland, Österreich, der Schweiz und Kanada**. Selbstverständlich werden die Ergebnisse anonym ausgewertet. Wir möchten hervorheben, dass es keine 'richtigen' Antworten gibt; alle genannten Alternativen entsprechen derzeit praktizierten Behandlungen.

Herzlichen Dank für Ihre Mitarbeit!

*Dr. med. Boris Hügler*

*Dr. med. Susanne Benseler*

*The Hospital for Sick Children, Toronto, Kanada*

Verwendete Abkürzungen: JIA – Juvenile Idiopathische Arthritis; NSAR – Nichtsteroidale Antirheumatika; DMARD – Disease-Modifying Anti-Rheumatic Drug (langwirksame Antirheumatika); ANA – Anti-nukleäre Antikörper; RF – Rheumafaktor; BSG - Blutsenkungsgeschwindigkeit

Bitte beantworten Sie die folgenden kurzen Fragen zu Ihrer Person.

## 1. Bitte geben Sie Ihre Email-Adresse an.

## 2. Bitte geben Sie Ihr derzeitiges Alter ein.

Alter in Jahren

## 3. Bitte geben Sie Ihr Geschlecht ein.

☐ weiblich

☐ männlich

## 4. Welche Ausbildung in Pädiatrischer Rheumatologie haben Sie erhalten?

☐ Arzt in Facharztweiterbildung

☐ Facharzt für Kinderheilkunde

☐ Zusatzbezeichnung "Kinder-Rheumatologe" oder vergleichbar

Andere (bitte angeben)

## 5. In welchem Jahr haben Sie Ihren Universitätsabschluss in Humanmedizin erhalten?

Jahr des

Universitätsabschlusses

# Bevorzugte Behandlungsmethoden bei JIA in Deutschland und Kanada

## 6. Bitte beschreiben Sie Ihr Tätigkeitsfeld:

☐ Universitätskrankenhaus

☐ Krankenhaus, nicht-universitär

☐ Selbständige Niederlassung

Andere (bitte angeben)

## 7. In welchem Land praktizieren Sie hauptsächlich?

☐ Deutschland

☐ Österreich

☐ Schweiz

Andere (bitte angeben)

**A** Bitte betrachten Sie den folgenden hypothetischen Fall: Ein **3 Jahre altes Mädchen** wird von ihren Eltern in Ihrer Praxis vorgestellt. Sie berichtet, dass sie seit zwei Monaten ein **geschwollenes rechtes Knie** hat und hinkt, insbesondere morgens. Die weitere Anamnese ergibt weder ein vorangegangenes Trauma noch eine vorangegangene Infektion. In der körperlichen Untersuchung finden Sie einen **Gelenkerguss in beiden Knien und beiden Knöchelgelenken** ohne Kontraktur, mit einer ansonsten normalen organ- und gelenkbezogenen Untersuchung. Die Laboruntersuchung zeigen ein normales Blutbild, Leber- und Nierenfunktionsparameter sowie Entzündungsparameter und einen **positiven ANA-Titer** mit negativem Rheumafaktor und negativem HLA-B27. Eine Augenuntersuchung (einschliesslich Spaltlampe) vor 2 Tagen war unauffällig. Sie stellen die Diagnose einer oligoartikulären JIA.

## 8. Welche der folgenden Medikamente würden Sie vorzugsweise in der Erstbehandlung verwenden?

☐ NSAR

☐ Intraartikuläre Gelenkinjektionen mit Kortikosteroiden

☐ DMARD

☐ Orale Kortikosteroide

☐ Biologika

Andere (bitte angeben)

# Bevorzugte Behandlungsmethoden bei JIA in Deutschland und Kanada

## 9. Was würden Sie in Bezug auf Krankengymnastik und körperliche Aktivität bei diesem Patienten empfehlen?

- ☐ Regelmässige wöchentliche Physiotherapie durch einen ausgebildeten Physiotherapeuten (einschliesslich Übungen zu Hause)
- ☐ Kontinuierliche Übungen zu Hause nach anfänglicher Betreuung durch den Arzt oder einen ausgebildeten Physiotherapeuten
- ☐ Ermutigung zu vermehrter körperlicher Aktivität zu Hause

Andere (bitte angeben)

**B** Bitte betrachten Sie den folgenden hypothetischen Fall: Ein Patient mit derselben Vorgeschichte wie der unter A beschriebene Fall wird von einem anderen Pädiatrischen Rheumatologen mit einem **NSAR** behandelt. Sie wird nach einem Umzug der Familie **6 Monate nach Beginn ihrer Symptome** in Ihrer Praxis vorgestellt. Sie klagt noch immer über Morgensteifigkeit, und Sie finden **Gelenkergüsse in beiden Knien**. Die sonstige Untersuchung einschliesslich der Knöchel ist unauffällig. Eine kürzliche durchgeführte Augenuntersuchung war ebenfalls unauffällig.

## 10. Welche der folgenden Medikamente würden Sie vorzugsweise zu diesem Zeitpunkt verwenden?

- ☐ NSAID
- ☐ Intraartikuläre Gelenkinjektionen mit Kortikosteroiden
- ☐ DMARD
- ☐ Orale Kortikosteroide
- ☐ Biologika

Andere (bitte angeben)

**C** Bitte betrachten Sie den folgenden hypothetischen Fall: Ein Patient mit derselben Vorgeschichte wie der unter A beschriebene Fall wird von einem anderen Pädiatrischen Rheumatologen mit einem **NSAR** behandelt. Sie wird nach einem Umzug der Familie **6 Monate nach Beginn ihrer Symptome** in Ihrer Praxis vorgestellt. Sie hat **keine Gelenkbeschwerden** mehr, aber wurde 3 Monate nach Diagnosestellung mit einer **chronischen anterioren Uveitis** diagnostiziert, die **therapierefraktär auf topische Steroide** ist. Die organ- und skelettbezogene Untersuchung einschliesslich Knie und Knöchel ist unauffällig.

## 11. Welche der folgenden Medikamente würden Sie vorzugsweise zu diesem Zeitpunkt verwenden?

- ☐ NSAR
- ☐ DMARD
- ☐ Orale Kortikosteroide
- ☐ Biologika

Andere (bitte angeben)

# Bevorzugte Behandlungsmethoden bei JIA in Deutschland und Kanada

**D** Bitte betrachten Sie den folgenden hypothetischen Fall: Ein **14 Jahre alter weiblicher Patient** stellt sich in Ihrer Praxis vor. Sie berichtet, dass sie in den letzten drei Monaten zunehmende Schwellungen beider Knie-, Knöchel-, Ellenbogen- und Handgelenke beobachtet hat, begleitet von Morgensteifigkeit für etwa 2 Stunden. Die weitere Anamnese ergibt weder ein vorangegangenes Trauma noch eine vorangegangene Infektion. In der körperlichen Untersuchung finden Sie **Gelenkergüsse in insgesamt 9 Gelenken**, mit einer ansonsten normalen organ- und gelenkbezogenen Untersuchung. Die Laboruntersuchung zeigen ein normales Blutbild, Leber- und Nierenfunktionsparameter, erhöhte Entzündungsparameter (BSG) und einen **positiven ANA-Titer mit negativem Rheumafaktor** und negative HLA-B27. Eine Augenuntersuchung (einschliesslich Spaltlampe) vor 2 Tagen war unauffällig. Sie stellen die Diagnose einer **seronegativen polyartikulären JIA**.

## 12. Welche der folgenden Medikamente würden Sie vorzugsweise in der Erstbehandlung verwenden?

- ☐ NSAR
- ☐ Intraartikuläre Gelenkinjektionen mit Kortikosteroiden
- ☐ DMARD
- ☐ Orale Kortikosteroide
- ☐ Biologika

Andere (bitte angeben)

## 13. Was würden Sie in Bezug auf Krankengymnastik und körperliche Aktivität bei diesem Patienten empfehlen?

- ☐ Regelmässige wöchentliche Physiotherapie durch einen ausgebildeten Physiotherapeuten (einschliesslich Übungen zu Hause)
- ☐ Kontinuierliche Übungen zu Hause nach anfänglicher Betreuung durch den Arzt oder einen ausgebildeten Physiotherapeuten
- ☐ Ermutigung zu vermehrter körperlicher Aktivität zu Hause

Andere (bitte angeben)

**E** Bitte betrachten Sie den folgenden hypothetischen Fall: Ein Patient mit derselben Vorgeschichte wie der unter D beschriebene Fall wird von einem anderen Pädiatrischen Rheumatologen mit DMARD behandelt. Sie wird nach einem Umzug der Familie in Ihrer Praxis vorgestellt, **einen Monat nach Behandlungsbeginn mit DMARD**. Sie hat noch immer Gelenksbeschwerden, und die körperliche Untersuchung zeigt **8 aktive Gelenke**.

## 14. Angenommen die unter E beschriebene Patientin zeigt auch in Folgeuntersuchungen einen unveränderten Befund, annähernd wie lange würden Sie nach Beginn einer Behandlung mit einem DMARD warten, bevor Sie Änderungen an der Behandlung vornehmen?

|      | 1 Monat               | 2 Monate              | 3 Monate              | 4 Monate              | 6 Monate              | 9 Monate              | 12 Monate             | 18 Monate             | 24 Monate             |
|------|-----------------------|-----------------------|-----------------------|-----------------------|-----------------------|-----------------------|-----------------------|-----------------------|-----------------------|
| Zeit | <input type="radio"/> |

## Bevorzugte Behandlungsmethoden bei JIA in Deutschland und Kanada

**15. Wie würden Sie zum Zeitpunkt, den Sie in der letzten Frage angegeben haben, Ihre Behandlung für die unter E beschriebene Patientin vorzugsweise ändern?**

- ☐ Umstieg auf ein anderes DMARD-Präparat
- ☐ Behandlungsbeginn mit einem zusätzlichen DMARD-Präparat
- ☐ Behandlung mit intraartikulären Kortikosteroiden
- ☐ Umstieg auf oder zusätzliche Behandlung mit einem Biologikum

Andere (bitte angeben)

**16. Angenommen die unter E beschriebene Patientin zeigt auch in Folgeuntersuchungen einen unveränderten Befund, annähernd wie lange würden Sie mit NSAID, DMARD oder Steroiden behandeln, bevor Sie eine Behandlung mit Biologika in Betracht ziehen?**

|      | 1 Monat                  | 2 Monate                 | 3 Monate                 | 4 Monate                 | 6 Monate                 | 9 Monate                 | 12 Monate                | 18 Monate                | 24 Monate                |
|------|--------------------------|--------------------------|--------------------------|--------------------------|--------------------------|--------------------------|--------------------------|--------------------------|--------------------------|
| Zeit | <input type="checkbox"/> |

In den folgenden Fragen interessieren wir uns für die **von Ihnen bevorzugten Medikamente** innerhalb der entsprechenden Gruppen.

**17. Gesetzt den Fall, Sie würden ein NSAR in der Behandlung eines 3 Jahre alten Mädchens mit oligoartikulärer JIA (ANA positiv, HLA-B27 negativ, RF negativ) ohne Uveitis einsetzen, welches wäre Ihr Medikament erster Wahl?**

- ☐ Naproxen
- ☐ Indomethacin
- ☐ Ibuprofen
- ☐ Diclofenac
- ☐ Piroxicam

Andere (bitte angeben)

## Bevorzugte Behandlungsmethoden bei JIA in Deutschland und Kanada

**18. Gesetzt den Fall, Sie würden ein NSAR in der Behandlung einer 13 Jahre alten weiblichen Patienten mit polyartikulärer JIA (ANA positiv, HLA-B27 negativ, RF negativ) ohne Uveitis einsetzen, welches wäre Ihr Medikament erster Wahl?**

☐ Naproxen

☐ Indomethacin

☐ Ibuprofen

☐ Diclofenac

☐ Piroxicam

Andere (bitte angeben)

**19. Welches Kortikosteroid-Präparat würden Sie für eine intraartikuläre Injektion des Knies bei oligoartikulärer JIA bevorzugt einsetzen?**

☐ Triamcinolonacetoneid (z.B. Volon A®)

☐ Triamcinolonhexacetoneid (z.B. Lederlon®)

☐ Betamethasone Acetate (z.B. Celeston-Depot®)

☐ Dexamethason (z.B. Lipotalon®)

☐ Methylprednisolone Acetate (z.B. Depo-Medrol®)

Andere (bitte angeben)

**20. Gesetzt den Fall, Sie würden ein DMARD in der Behandlung einer 13 Jahre alten weiblichen Patienten mit polyartikulärer JIA (ANA positive, HLA-B27 negativ) ohne Uveitis einsetzen, welches wäre Ihr Medikament erster Wahl?**

☐ Methotrexat

☐ Leflunomid

☐ Cyclosporin A

☐ Mycophenolat Mofetil oder EC-coated Mycophenolat

☐ Sulfasalazin

Andere (bitte angeben)

## Bevorzugte Behandlungsmethoden bei JIA in Deutschland und Kanada

**21. Gesetzt den Fall, Sie würden ein Biologikum in der Behandlung einer 13 Jahre alten weiblichen Patienten mit therapierefraktärer polyartikulärer JIA (ANA positive, HLA-B27 negativ, RF negativ) ohne Uveitis einsetzen, welches wäre Ihr Medikament erster Wahl?**

☐ Infliximab (Remicade®)

☐ Etanercept (Enbrel®)

☐ Adalimumab (Humira®)

☐ Abatacept (Orencia®)

Andere (bitte angeben)

Herzlichen Dank für Ihre Mitarbeit in dieser Umfrage!
